# Supplementary material for: Cooperative and anticooperative effects in resonance assisted hydrogen bonds in merged structures of malondialdehyde
Source: Royal Society of Chemistry journal article supplement (doi:10.1039/c6cp04877c), 2016-09-01
Supplement: c6cp04877c1.pdf [file c6cp04877c1.pdf]

# Cooperative and anticooperative effects in resonance assisted hydrogen bonds in merged structures of malondialdehyde

Eduardo Romero-Montalvo<sup>†</sup>, José Manuel Guevara-Vela<sup>‡</sup>, Aurora Costales<sup>‡</sup>, Ángel Martín  
Pendás<sup>‡</sup>, Tomás Rocha-Rinza<sup>†,\*</sup>

August 29, 2016

## Supporting Information

---

<sup>†</sup>Institute of Chemistry, National Autonomous University of Mexico, Circuito Exterior, Ciudad Universitaria, Delegación Coyoacán, C.P. 04510, Mexico City, Mexico.

<sup>‡</sup>Department of Analytical and Physical Chemistry, University of Oviedo, E-33006, Oviedo, Spain.

\*To whom correspondence should be addressed: tomasrocharinza@gmail.com

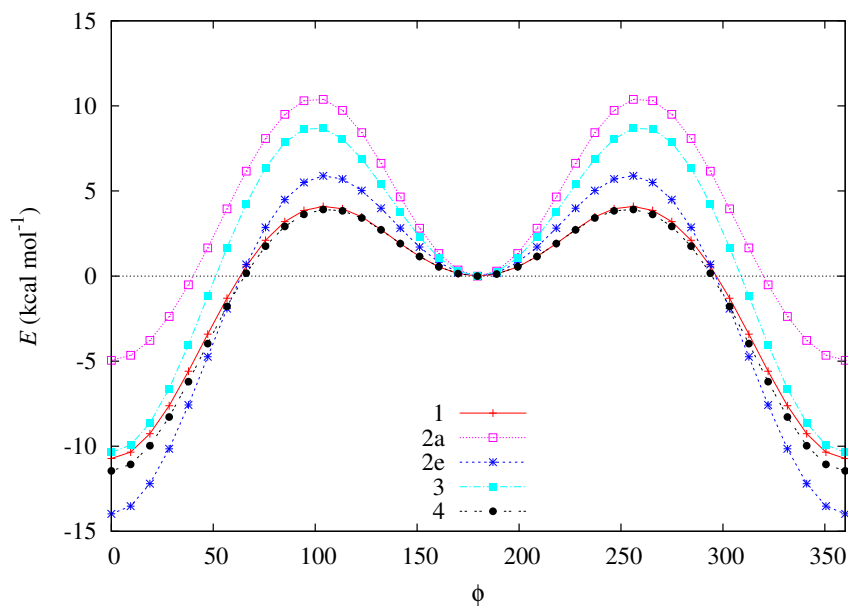

Figure S1: Potential energy curves for the scan of the dihedral angles shown in equations (8)–(11) of the manuscript along with the corresponding plot for malondialdehyde. The approximation HF/aug-cc-pVTZ was used throughout.

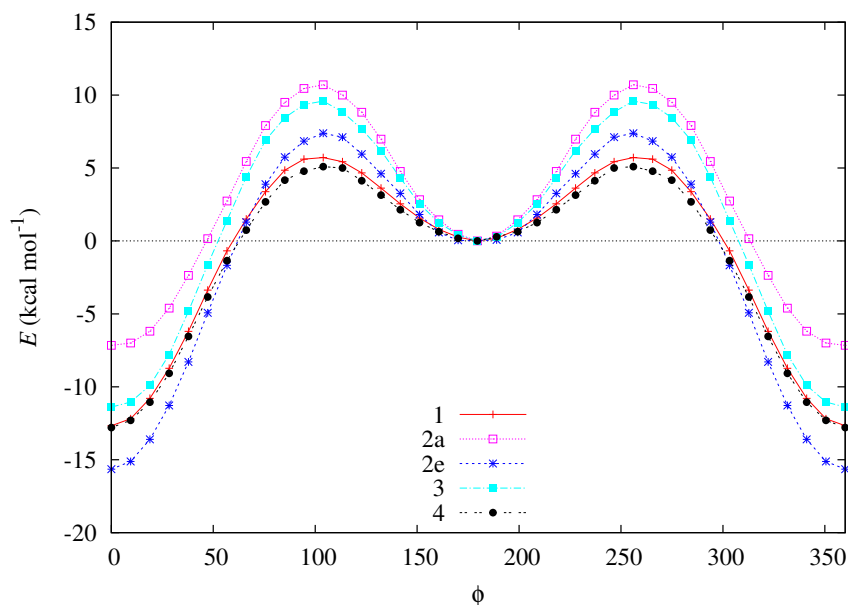

Figure S2: Formation energies of the resonance assisted hydrogen bonds considered in this investigation given by the rotation of the dihedral angles specified in equations (8)–(11) of the body of the paper together with the corresponding curve of propanedial. The electronic energies were computed with the RIJCOSX-MP2/aug-cc-pVTZ level of theory.
